# Supplementary material for: Genome-wide changes in expression profile of murine endogenous retroviruses (MuERVs) in distant organs after burn injury
Source: PubMed Central journal article supplement (PMC2241634; doi:10.1186/1471-2164-8-440), 2007-11-28
Supplement: 1471-2164-8-440-S1.pdf [file 1471-2164-8-440-S1.pdf]

Figure S1

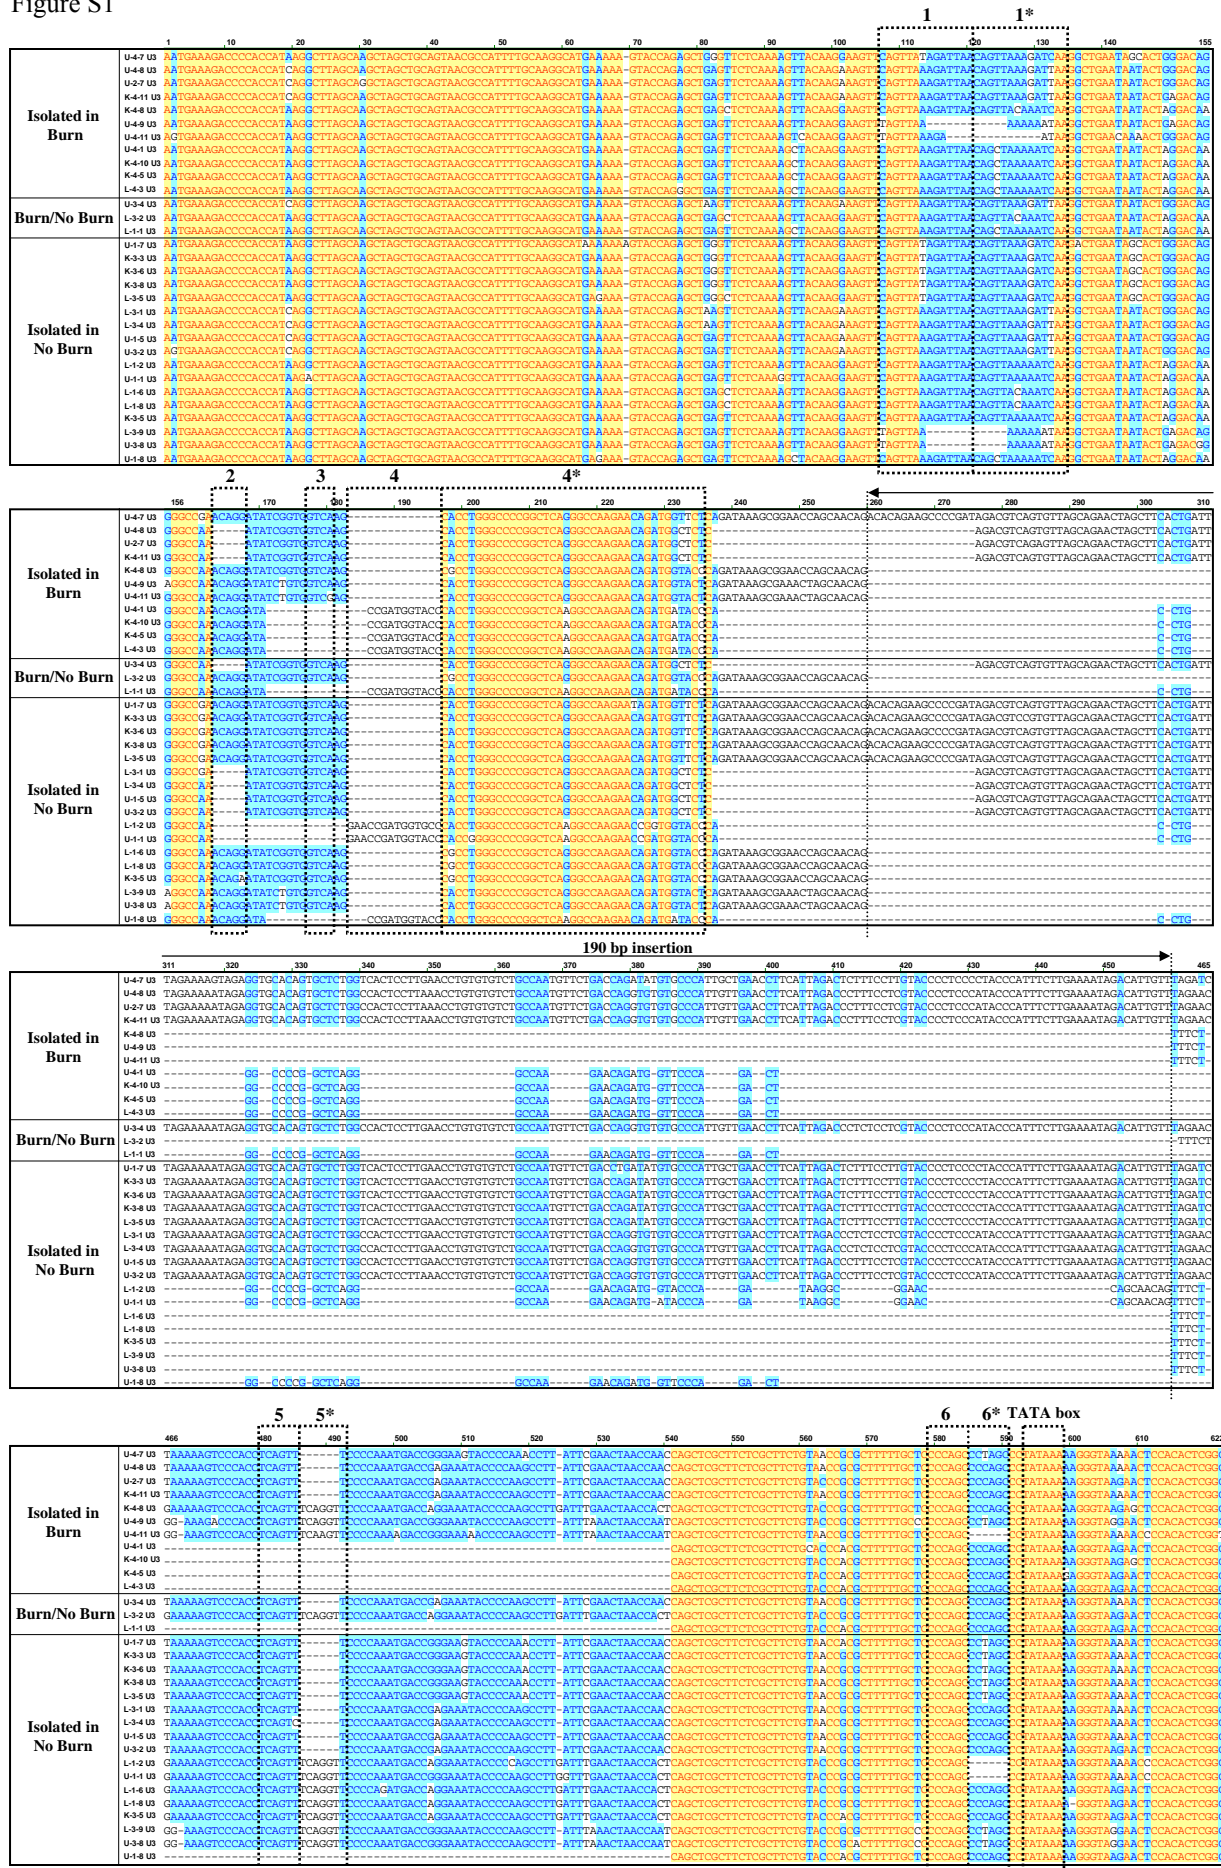



**Table S2. Neighboring host genes within 110 kb upstream and downstream of integration sites of individual putative MuERVs**

| Ch <sup>a</sup>       | Virus                 | Gene                 | Or <sup>**</sup>                                            | Description                                               | Ch <sup>a</sup>                                       | Virus                                             | Gene                                                  | Or <sup>**</sup>                                                                | Description                                       |                                                            |
|-----------------------|-----------------------|----------------------|-------------------------------------------------------------|-----------------------------------------------------------|-------------------------------------------------------|---------------------------------------------------|-------------------------------------------------------|---------------------------------------------------------------------------------|---------------------------------------------------|------------------------------------------------------------|
| 1                     | K4-11.1a              | <u>Selp</u>          | (+/+)                                                       | selectin, platelet                                        | 9                                                     | L-1-2.8a                                          | <u>Zfp42</u>                                          | (-/-)                                                                           | zinc finger protein 42                            |                                                            |
|                       |                       | <u>E5</u>            | (+/+)                                                       | coagulation factor V                                      |                                                       |                                                   | L-1-2.8b                                              | <u>Asna1</u>                                                                    | (-/-)                                             | arsA arsenite transporter, ATP-binding, homolog 1          |
|                       |                       | <u>S1C19a2</u>       | (+/+)                                                       | solute carrier family 19 (thiamine transporter), member 2 |                                                       | <u>Tnpo2</u>                                      |                                                       | (-/-)                                                                           | transportin 2 (import 3, karyopherin beta 2b)     |                                                            |
|                       |                       | <u>Nme7</u>          | (+/+)                                                       | non-metastatic cells 7                                    |                                                       | <u>Fbxw9</u>                                      | (-/-)                                                 | F-box and WD-40 domain protein 9                                                |                                                   |                                                            |
|                       |                       | <u>Blzfl</u>         | (+/-)                                                       | basic leucine zipper nuclear factor 1                     |                                                       | <u>Dhps</u>                                       | (-/-)                                                 | deoxyhypusine synthase                                                          |                                                   |                                                            |
|                       | K-4-11.1b             | <u>Nek2</u>          | (+/+)                                                       | never in mitosis gene a -related expressed kinase 2       |                                                       | <u>Man2b1</u>                                     | (-/-)                                                 | mannosidase 2, alpha B1                                                         |                                                   |                                                            |
|                       |                       | <u>Slc30a1</u>       | (+/+)                                                       | solute carrier family 30 (zinc transporter), member 1     |                                                       | <u>Olfr371</u>                                    | (-/-)                                                 | olfactory receptor 371                                                          |                                                   |                                                            |
|                       | U-4-8.1 <sup>c</sup>  | <u>Degs1</u>         | (+/-)                                                       | degenerative spermatocyte homolog 1                       |                                                       | 10                                                | L-1-2.9                                               | <u>Sorl1</u>                                                                    | (-/-)                                             | sortilin-related receptor, LDLR class A repeats-containing |
|                       |                       | <u>Fbxo28</u>        | (+/-)                                                       | F-box protein 28                                          |                                                       |                                                   |                                                       | K-3-3.10a                                                                       | <u>Vip</u>                                        | (-/-)                                                      |
|                       | U-4-11.1 <sup>c</sup> | <u>Dusp12</u>        | (+/+)                                                       | dual specificity phosphatase 12                           |                                                       | <u>Rgs17</u>                                      | (-/+)                                                 |                                                                                 | regulator of G-protein signaling 17               |                                                            |
|                       |                       | <u>Fcgr3a</u>        | (+/+)                                                       | Fc receptor, IgG, low affinity IIIa                       |                                                       | <u>Fbxo5</u>                                      | (-/+)                                                 |                                                                                 | F-box protein 5                                   |                                                            |
|                       |                       | <u>Fcgr2b_3</u>      | (+/-)                                                       | Fc receptor, IgG, low affinity IIb, III                   |                                                       | <u>Mtrf1l</u>                                     | (-/+)                                                 |                                                                                 | mitochondrial translational release factor 1-like |                                                            |
|                       |                       | <u>Fcrl a_b</u>      | (+/-)                                                       | Fc receptor like a, b                                     |                                                       | K-3-3.10b                                         | <u>Slc2a12</u>                                        |                                                                                 | (+/+)                                             | solute carrier family 2, member 12                         |
|                       |                       | <u>Atf6</u>          | (+/-)                                                       | activating transcription factor 6                         |                                                       |                                                   | <u>Tbpl1</u>                                          | (-/+)                                                                           | TATA box binding protein-like 1                   |                                                            |
|                       | 2                     | K-4-11.2             | <u>Nr4a2</u>                                                | (-/-)                                                     |                                                       | nuclear receptor subfamily 4, group A, member 2   | <u>Tcf21</u>                                          | (+/-)                                                                           | transcription factor 21                           |                                                            |
|                       |                       |                      | <u>Gpd2</u>                                                 | (-/+)                                                     |                                                       | glycerol phosphate dehydrogenase 2, mitochondrial | K-4-11.10a                                            | <u>Ust</u>                                                                      | (-/-)                                             | uronyl-2-sulfotransferase                                  |
|                       | 3                     | K-3-3.3b             | <u>Fubp1</u>                                                | (+/+)                                                     |                                                       | far upstream element (FUSE) binding protein 1     |                                                       | K-4-11.10b                                                                      | <u>Zbtb24</u>                                     | (+/+)                                                      |
|                       |                       |                      | <u>Usp33</u>                                                | (+/+)                                                     |                                                       | ubiquitin specific peptidase 33                   | <u>Mical1</u>                                         |                                                                                 | (+/+)                                             | microtubule associated monooxygenase                       |
|                       |                       |                      | <u>Zzz3</u>                                                 | (+/+)                                                     |                                                       | zinc finger, ZZ domain containing 3               | <u>Cd164</u>                                          | (+/+)                                                                           | CD164 antigen                                     |                                                            |
| 4                     | L-1-1.4 <sup>a</sup>  | <u>Egr</u>           | (+/+)                                                       | gardner-rasheed feline sarcoma viral oncogene homolog     | <u>Smpd2</u>                                          | (+/+)                                             | sphingomyelin phosphodiesterase 2                     |                                                                                 |                                                   |                                                            |
|                       |                       | <u>Ahdcl</u>         | (+/+)                                                       | AT hook, DNA binding motif, containing 1                  | K-3-3.11a                                             | <u>Drg2</u>                                       | (-/+)                                                 | developmentally regulated GTP binding protein 2                                 |                                                   |                                                            |
|                       |                       | <u>Wasf2</u>         | (+/+)                                                       | WAS protein family, member 2                              |                                                       | <u>Myo15</u>                                      | (-/+)                                                 | myosin XV                                                                       |                                                   |                                                            |
|                       | K-3-6.4 <sup>b</sup>  | <u>Efcabp1</u>       | (-/-)                                                       | EF hand calcium binding protein 1                         | <u>Alkbh5</u>                                         | (-/+)                                             | alkB, alkylation repair homolog 5 (E.coli)            |                                                                                 |                                                   |                                                            |
|                       |                       | <u>Tmem64</u>        | (-/+)                                                       | transmembrane protein 64                                  | K-3-3.11c                                             | <u>Dhx40</u>                                      | (+/-)                                                 | DEAH (Asp-Glu-Ala-His) box polypeptide 40                                       |                                                   |                                                            |
|                       | K-3-3.4               | <u>Ankrd6</u>        | (-/-)                                                       | ankyrin repeat domain 6                                   |                                                       | <u>Ypel2</u>                                      | (+/-)                                                 | Yippee-like 2 (Drosophila)                                                      |                                                   |                                                            |
|                       |                       | K-4-11.4a            | <u>Lepr</u>                                                 | (-/+)                                                     | leptine receptor                                      | K-4-11.11b                                        | <u>Akap1</u>                                          | (-/-)                                                                           | A kinase (PRKA) anchor protein 1                  |                                                            |
|                       | K-4-11.4b             |                      | <u>Scp2</u>                                                 | (-/-)                                                     | sterol carrier protein 2, liver                       |                                                   | <u>Scpep1</u>                                         | (-/-)                                                                           | serine carboxypeptidase 1                         |                                                            |
|                       |                       | 5                    | K-3-3.5b                                                    | <u>Echdc2</u>                                             | (-/+)                                                 | enoyl coenzyme A hydratase domain containing 2    | <u>Coil</u>                                           | (-/+)                                                                           | coilin                                            |                                                            |
|                       | <u>Cpeb2</u>          |                      |                                                             | (+/+)                                                     | cytoplasmic polyadenylation element binding protein 2 | <u>Trim25</u>                                     | (-/+)                                                 | tripartite motif protein 25                                                     |                                                   |                                                            |
| K-3-3.5a              | <u>Mvl2</u>           |                      | (+/+)                                                       | myosin, light polypeptide 2                               | K-3-6.12 <sup>b</sup>                                 | <u>Ctse</u>                                       | (+/+)                                                 | cathepsin E                                                                     |                                                   |                                                            |
|                       | <u>Ppp1cc</u>         |                      | (+/+)                                                       | protein phosphatase 1, catalytic subunit, gamma isoform   |                                                       | <u>Sos2</u>                                       | (-/+)                                                 | son of sevenless homolog 2 (Drosophila)                                         |                                                   |                                                            |
| U-1-5.5a <sup>b</sup> | <u>Hvcn1</u>          |                      | (+/+)                                                       | hydrogen voltage-gated channel 1                          | 13                                                    | K-3-3.13                                          | <u>Hist1h2ai</u>                                      | (+/+)                                                                           | histone 1, H2ai                                   |                                                            |
|                       | <u>Pptc7</u>          |                      | (+/+)                                                       | PTC7 protein phosphatase homolog (S. cerevisiae)          |                                                       |                                                   | <u>Hist1h2ab</u>                                      | (+/+)                                                                           | histone 1, H2ab                                   |                                                            |
|                       | <u>Ccdc63</u>         |                      | (+/-)                                                       | coiled-coil domain containing 63                          |                                                       |                                                   | <u>Hist1h2bb</u>                                      | (+/+)                                                                           | histone 1, H2bb                                   |                                                            |
| U-1-5.5b <sup>b</sup> | <u>Prom1</u>          |                      | (+/-)                                                       | prominin 1                                                |                                                       |                                                   | <u>Hist1h2bc</u>                                      | (+/+)                                                                           | histone 1, H2bc                                   |                                                            |
|                       | <u>Srp72</u>          |                      | (+/+)                                                       | signal recognition particle 72                            |                                                       |                                                   | <u>Hist1h2bf</u>                                      | (+/+)                                                                           | histone 1, H2bf                                   |                                                            |
| U-4-8.5 <sup>c</sup>  | <u>Arl9</u>           |                      | (+/+)                                                       | ADP-ribosylation factor-like 9                            |                                                       |                                                   | <u>Hist1h2bm</u>                                      | (+/+)                                                                           | histone 1, H2bm                                   |                                                            |
|                       | <u>Paics</u>          |                      | (+/+)                                                       | phosphoribosylaminoimidazole carboxylase                  |                                                       |                                                   | <u>Hist1h3g</u>                                       | (+/+)                                                                           | histone 1, H3g                                    |                                                            |
|                       | <u>Ppat</u>           |                      | (+/-)                                                       | phosphoribosyl pyrophosphate amidotransferase             |                                                       |                                                   | <u>Hist1h4a</u>                                       | (+/+)                                                                           | histone 1, H4a                                    |                                                            |
|                       | <u>Trrap</u>          |                      | (+/-)                                                       | transformation/transcription domain-associated protein    |                                                       |                                                   | <u>Olfr1359</u>                                       | (+/+)                                                                           | olfactory receptor 1359                           |                                                            |
|                       | <u>Tmem130</u>        | (+/-)                | transmembrane protein 130                                   | K-3-5.13                                                  |                                                       |                                                   | <u>Zfp712</u>                                         | (-/+)                                                                           | zinc finger protein 712                           |                                                            |
| L-3-9.5 <sup>b</sup>  | <u>Srpk2</u>          | (-/-)                | serine/arginine-rich protein specific kinase 2              |                                                           | K-4-11.13                                             | <u>Tnpo1</u>                                      | (-/-)                                                 | transportin 1                                                                   |                                                   |                                                            |
|                       | <u>Pus7</u>           | (-/-)                | psedouridylylate synthase 7 homolog (S. cerevisiae)         | <u>Rpl27a</u>                                             |                                                       | (-/+)                                             | ribosomal protein L27a                                |                                                                                 |                                                   |                                                            |
|                       | <u>Rint1</u>          | (-/-)                | RAD50 interactor 1                                          | 14                                                        | L-1-2.14                                              | <u>Mrp152</u>                                     | (+/+)                                                 | mitochondrial ribosomal protein L52                                             |                                                   |                                                            |
| 6                     | K-3-6.6 <sup>b</sup>  | <u>Sucgl1</u>        | (-/+)                                                       |                                                           |                                                       | succinate-CoA ligase, GDP-forming, alpha subunit  | <u>Mmp14</u>                                          | (+/+)                                                                           | matrix metalloproteinase 14 (membrane-inserted)   |                                                            |
|                       |                       | 7                    | K-3-6.7 <sup>b</sup>                                        |                                                           |                                                       | <u>Trpm1</u>                                      | (+/+)                                                 | transient receptor potential cation channel, subfamily M                        | <u>Lrp10</u>                                      | (+/+)                                                      |
| K-4-11.7a             | <u>Usp29</u>          |                      |                                                             |                                                           |                                                       | (-/+)                                             | ubiquitin specific peptidase 29                       | <u>Rem2</u>                                                                     | (+/+)                                             | rad and gem related GTP binding protein 2                  |
|                       | K-4-11.7c             | <u>Zfp418</u>        | (-/+)                                                       |                                                           |                                                       | zinc finger protein 418                           | <u>Cdh24</u>                                          | (+/+)                                                                           | cadherin-like 24                                  |                                                            |
| <u>Atp4a</u>          |                       | (+/+)                | ATPase, H+/K+ exchanging, gastric, alpha polypeptide        |                                                           |                                                       | <u>Prmt5</u>                                      | (+/-)                                                 | protein arginine N-methyltransferase 5                                          |                                                   |                                                            |
| <u>Krt1dap</u>        |                       | (+/+)                | keratinocyte differentiation associated protein             |                                                           |                                                       | <u>Jub</u>                                        | (-/+)                                                 | ajuba                                                                           |                                                   |                                                            |
| <u>Sbsn</u>           |                       | (+/+)                | suprabasin                                                  |                                                           |                                                       | <u>Psmb5</u>                                      | (+/-)                                                 | proteasome subunit beta type 5 precursor                                        |                                                   |                                                            |
| <u>Wbp7</u>           |                       | (+/-)                | WW domain binding protein 7                                 |                                                           |                                                       | <u>Acin1</u>                                      | (-/+)                                                 | apoptotic chromatin condensation inducer 1                                      |                                                   |                                                            |
| <u>Zbtb32</u>         |                       | (+/-)                | zinc finger and BTB domain containing 32                    |                                                           |                                                       | 15                                                | U-1-5.15 <sup>b</sup>                                 | <u>Bop1</u>                                                                     | (-/-)                                             | block of proliferation 1                                   |
| <u>Upk1a</u>          |                       | (+/-)                | uroplakin 1A                                                | <u>Nfkbil2</u>                                            | (-/-)                                                 |                                                   |                                                       | nuclear factor of kappa light peptide gene enhancer in B cells inhibitor-like 2 |                                                   |                                                            |
| K-4-11.7d             |                       | <u>Cox6b1</u>        | (+/-)                                                       | cytochrome c oxidase, subunit VIb polypeptide 1           | <u>Slc39a4</u>                                        | (-/-)                                             | solute carrier family 39 (zinc transporter), member 4 |                                                                                 |                                                   |                                                            |
|                       |                       | <u>Etv2</u>          | (+/-)                                                       | ets variant gene 2                                        | <u>Dgat1</u>                                          | (-/-)                                             | diacylglycerol O-acyltransferase 1                    |                                                                                 |                                                   |                                                            |
|                       |                       | <u>Tmem147</u>       | (+/-)                                                       | transmembrane protein 147                                 | <u>Scrt1</u>                                          | (-/-)                                             | scratch homolog 1, zinc finger protein (Drosophila)   |                                                                                 |                                                   |                                                            |
|                       |                       | <u>Gapdhs</u>        | (+/-)                                                       | glyceraldehyde-3-phosphate dehydrogenase                  | <u>Fbxl6</u>                                          | (-/-)                                             | F-box and leucine-rich repeat protein 6               |                                                                                 |                                                   |                                                            |
|                       |                       | <u>Nucb2</u>         | (+/+)                                                       | nucleobindin 2                                            | <u>Cpsfl</u>                                          | (-/-)                                             | cleavage and polyadenylation specific factor 1        |                                                                                 |                                                   |                                                            |
|                       | <u>Pik3c2a</u>        | (+/-)                | phosphatidylinositol 3-kinase, C2 domain, alpha polypeptide | <u>Vps28</u>                                              | (-/-)                                                 | vacuolar protein sorting 28 (yeast)               |                                                       |                                                                                 |                                                   |                                                            |
|                       | 8                     | K-3-6.8 <sup>b</sup> | <u>Rpl13</u>                                                | (+/+)                                                     | ribosomal protein L13                                 | <u>Foxh1</u>                                      | (-/-)                                                 | forkhead box H1                                                                 |                                                   |                                                            |
|                       |                       |                      | <u>Dpep1</u>                                                | (+/+)                                                     | dipeptidase 1 (renal)                                 | <u>Cyhr1</u>                                      | (-/-)                                                 | cysteine and histidine rich -1                                                  |                                                   |                                                            |
|                       |                       | <u>Cdk10</u>         | (+/+)                                                       | cyclin-dependent kinase (CDC2-like) 10                    | <u>Scx</u>                                            | (-/+)                                             | scleraxis                                             |                                                                                 |                                                   |                                                            |
|                       |                       | <u>Zfp276</u>        | (+/+)                                                       | zinc finger protein (C2H2 type) 276                       | <u>Hsf1</u>                                           | (-/+)                                             | heat shock factor 1                                   |                                                                                 |                                                   |                                                            |
| <u>Spg7</u>           |                       | (+/+)                | spastic paraplegia 7 homolog (human)                        | <u>GPR172b</u>                                            | (-/+)                                                 | G protein-coupled receptor 172B                   |                                                       |                                                                                 |                                                   |                                                            |
| <u>Fanca</u>          |                       | (+/-)                | fanconi anemia, complementation group A                     | <u>Adck5</u>                                              | (-/+)                                                 | aarF domain containing kinase 5                   |                                                       |                                                                                 |                                                   |                                                            |
| <u>Sult5a1</u>        |                       | (+/-)                | sulfotransferase family 5A, member 1                        | <u>Ppp1r16a</u>                                           | (-/+)                                                 | protein phosphatase 1, regulatory (inhibitor)     |                                                       |                                                                                 |                                                   |                                                            |
| <u>Peoln3</u>         |                       | (+/-)                | procollagen (type III) N-endopeptidase                      | 18                                                        | U-4-8.18 <sup>c</sup>                                 | <u>Mbp</u>                                        | (+/+)                                                 | myelin basic protein                                                            |                                                   |                                                            |
| <u>Cot1l</u>          |                       | (-/-)                | coactosin-like 1 (Dictyostelium)                            |                                                           |                                                       | <u>Zfp236</u>                                     | (+/-)                                                 | zinc finger protein 236                                                         |                                                   |                                                            |
| U-3-4.8 <sup>a</sup>  |                       | <u>Usp10</u>         | (-/+)                                                       | ubiquitin specific peptidase 10                           | 19                                                    | K-4-11.19                                         | <u>Lgil</u>                                           | (+/+)                                                                           | leucine-rich repeat LGI family, member 1          |                                                            |
|                       |                       | <u>Crispld2</u>      | (+/-)                                                       | cysteine-rich secretory protein LCCL domain containing 2  |                                                       |                                                   | <u>Tmem20</u>                                         | (+/+)                                                                           | transmembrane protein 20                          |                                                            |

Putative MuERVs isolated with 100% homology with respective U3 probes: <sup>a</sup> Isolated in Burn/No Burn, <sup>b</sup> Isolated in No Burn, and <sup>c</sup> Isolated in Burn. \*chromosome \*\* orientation (virus/gene)
